# Supplementary material for: Interfacial interaction modes construction of various functional SSBR–silica towards high filler dispersion and excellent composites performances
Source: Royal Society of Chemistry journal article supplement (doi:10.1039/c9ra02783a), 2019-01-01
Supplement: c9ra02783a1.pdf [file c9ra02783a1.pdf]

## Electronic Supplementary Information

### Interfacial interaction modes construction of various functional SSBR–silica to high filler dispersion and excellent composites performances

Wei Gao, Jianmin Lu\*, Wenna Song, Jianfang Hu, Bingyong Han\*

*State Key Laboratory of Chemical Resource Engineering, Beijing University of Chemical Technology, Beijing 100029, P. R. China*

E-mail of corresponding authors:

Jianmin Lu: [lujm@mail.buct.edu.cn](mailto:lujm@mail.buct.edu.cn)

Bingyong Han: [hanby@mail.buct.edu.cn](mailto:hanby@mail.buct.edu.cn)

#### 1. Synthesis of SSBR samples

SSBR was synthesized via an anionic copolymerization under dry nitrogen atmosphere at 50 °C in a 2-L stainless steel reactor. Cyclohexane, *n*-BuLi, and DMTHFA were used as solvent, initiator, and regulator, respectively. The St, Bd, and DMTHFA were dissolved in cyclohexane in the 2-L stainless steel reactor. The mass ratio of St to Bd was 25:75. After the solution was stirred for 20 min, the appropriate amount of *n*-BuLi was then added into the 2-L stainless steel reactor. The molar ratio of DMTHFA to *n*-BuLi was 0.82:1. The anionic copolymerization was carried out at 50 °C for 2 h, and then ethanol was added to the reactant solution to terminate the copolymerization.

## 2. Formulations of silica/F-SSBR composites

**Table S1.** Formulations of silica/F-SSBR composites.

| Samples                                           | Silica/SSBR | Silica/SSBR/Si69 | Silica/F-SSBR |
|---------------------------------------------------|-------------|------------------|---------------|
| SSBR (phr <sup>a</sup> )                          | 100         | 100              | 0             |
| F-SSBR (phr <sup>a</sup> )                        | 0           | 0                | 100           |
| Silica (phr <sup>a</sup> )                        | 50          | 50               | 50            |
| Si-69 (phr <sup>a</sup> )                         | 0           | 4                | 0             |
| Zinc oxide (phr <sup>a</sup> )                    | 2.5         | 2.5              | 2.5           |
| Stearic acid (phr <sup>a</sup> )                  | 1           | 1                | 1             |
| Antioxidant 4020 <sup>b</sup> (phr <sup>a</sup> ) | 2           | 2                | 2             |
| CBS <sup>c</sup> (phr <sup>a</sup> )              | 1.4         | 1.4              | 1.4           |
| DPG <sup>d</sup> (phr <sup>a</sup> )              | 1.5         | 1.5              | 1.5           |
| Sulfur (phr <sup>a</sup> )                        | 1.4         | 1.4              | 1.4           |

<sup>a</sup> Parts-per-hundred rubber.

<sup>b</sup> *N*-1,3-dimethylbutyl-*N'*-phenyl-*P*-phenylenediamine.

<sup>c</sup> *N*-cyclohexyl-2-beozothiazole sulfonamide.

<sup>d</sup> 1,3-diphenylguanidine.

## 3. Crosslink density measurements of silica/F-SSBR vulcanizates

A square test vulcanizate was immersed into toluene. The swollen vulcanizate was weighed every 12 h until the mass was constant (i.e., swelling equilibrium). After reaching swelling equilibrium, the vulcanizate was carefully removed from the toluene, and the toluene on the vulcanizate surface was sucked away by a filter paper. Then, the vulcanizate was weighed ( $m_1$ ) and dried in an oven at 80 °C for 60 h to steam off all the toluene. The final mass of the vulcanizate was recorded as  $m_2$ . The crosslink density  $\nu_e$

of the vulcanizate was calculated by the Flory–Rehner equation:<sup>1,2</sup>

$$\nu_e = - \frac{\ln(1 - \nu_r) + \chi_s \nu_r}{V_s (\nu_r^{1/3} - 0.5 \nu_r)} \quad (S1)$$

where  $\nu_r$ ,  $\chi_s$ , and  $V_s$  are the volume fraction of the polymer, interaction parameter

between SSBR and toluene, and the molar volume of the toluene (105.7 cm<sup>3</sup>/mol),

$$v_r = \frac{(m_2 - m_{ins})/\rho_r}{(m_1 - m_2)/\rho_s + (m_2 - m_{ins})/\rho_r}$$

(S2)

where  $m_{ins}$  is the weight of the insoluble components in the test vulcanizate,  $\rho_r$  is the density of rubber, and  $\rho_s$  is the density of toluene (0.867 g/cm<sup>3</sup>).

The  $\chi$  was determined by the equation:<sup>4,5</sup>

$$\chi = \frac{V_s (\delta_r - \delta_s)^2}{RT} + 0.34$$

(S3)

where  $V_s$  is the molar volume of the toluene (105.7 cm<sup>3</sup>/mol),  $\delta_r$  is the solubility parameters of the rubber, and  $\delta_s$  is the solubility parameters of the toluene.

#### 4. Synthesis of F-SSBRs

**Table S2.** Characteristics of SSBR and F-SSBRs.

| Samples        | Compositions <sup>a</sup> (wt%) |                            |                            |                                                            | $M_n \times 10^{-4}$<br>(g·mol <sup>-1</sup> ) | $M_w/M_n$ |
|----------------|---------------------------------|----------------------------|----------------------------|------------------------------------------------------------|------------------------------------------------|-----------|
|                | Styrene<br>units                | Butadiene units            |                            | Grafted mercaptans<br>+reacted 1,2-<br>Polybutadiene units |                                                |           |
|                |                                 | 1,2-Polybutadiene<br>units | 1,4-Polybutadiene<br>units |                                                            |                                                |           |
| SSBR           | 22.5                            | 42.7                       | 34.8                       | 0                                                          | 18.1                                           | 1.11      |
| SSBR-g-MPL70   | 23.0                            | 40.1                       | 31.4                       | 5.5                                                        | 18.5                                           | 1.15      |
| SSBR-g-MUA70   | 20.9                            | 39.5                       | 29.6                       | 10.0                                                       | 18.6                                           | 1.11      |
| SSBR-g-MPTES13 | 18.4                            | 47.8                       | 31.7                       | 2.1                                                        | 18.6                                           | 1.10      |
| SSBR-g-MPTES42 | 17.9                            | 45.0                       | 30.4                       | 6.7                                                        | 18.7                                           | 1.16      |
| SSBR-g-MPTES70 | 21.1                            | 38.7                       | 29.6                       | 10.6                                                       | 19.6                                           | 1.11      |

<sup>a</sup> The compositions of SSBR and F-SSBRs were calculated through the analysis of <sup>1</sup>H NMR by using Eqs. (S4)–(S8).

The compositions of SSBR and F-SSBRs were estimated from the <sup>1</sup>H NMR spectra by using Eqs. (S4)–(S8):

$$\frac{2N_{Bd1,4} + N_{Bd1,2}}{2N_{Bd1,2}} = \frac{A_{5.10-5.90}}{A_{4.45-5.10}}$$

(S4)

$$\frac{N_{Bd1,4} + N_{Bd1,2}}{2N_{Bd1,2}} = \frac{1}{A_{Methylene-H}} \quad (S5)$$

$$\frac{N_{St}}{2N_{Bd1,2}} = \frac{A_{6.70-7.23}}{A_{4.45-5.10}} \quad (S6)$$

(S7)

$$M_{Bd} \times N_{Bd1,4} + M_{Bd} \times N_{Bd1,2} + M_{St} \times N_{St} + M_{Mercaptan} \times N_{Mercaptan} + M_{Bd} \times N_{Mercaptan} = M_n \quad (S8)$$

where  $N_{Bd1,2}$ ,  $N_{Bd1,4}$ ,  $N_{St}$ , and  $N_{Mercaptan}$  represent the molar numbers of 1,2-polybutadiene units, 1,4-polybutadiene units, styrene units, and mercaptan units in the F-SSBR, respectively.  $A_{4.45-5.10}$ ,  $A_{5.10-5.90}$ , and  $A_{6.70-7.23}$  represent the NMR peak areas in the ranges of  $\delta = 4.45-5.10$ ,  $5.10-5.90$ , and  $6.70-7.23$  ppm, respectively.  $A_{Methylene-H}$  represents the NMR peak areas of methylene protons in  $-CH_2OH$ ,  $-CH_2COOH$ , and  $-Si-(OCH_2CH_3)_3$ , respectively. The “x” denotes, respectively, the hydrogen atom numbers of methylene protons in  $-CH_2OH$ ,  $-CH_2COOH$ , and  $-Si-(OCH_2CH_3)_3$ . For SSBR-g-MPL,  $A_{Methylene-H}$  is the NMR peak areas in the range of  $\delta = 3.70-3.85$ , and “x” is “2”. For SSBR-g-MUA,  $A_{Methylene-H}$  denotes the NMR peak areas in the range of  $\delta = 2.30-2.40$ , and “x” is “2”. For SSBR-g-MPTES,  $A_{Methylene-H}$  represents the NMR peak areas in the range of  $\delta = 3.80-3.92$ , and “x” is “6”.

The grafting percentage (GP) of mercaptan based on SSBR was calculated from  $^1H$  NMR spectra by using Eq. (S9).

$$GP\% = \frac{M_{Mercaptan} \times N_{Mercaptan}}{M_{Bd} \times N_{Bd1,4} + M_{Bd} \times N_{Bd1,2} + M_{St} \times N_{St} + M_{Bd} \times N_{Mercaptan}} \times 100\%$$

(S9)

## 5. Torque values of SSBR, F-SSBRs and their compounds

**Table S3.** Torque values of SSBR, F-SSBRs and their compounds.

| Samples               | $M_H/dN.m$ | $M_L/dN.m$ | $M_H-M_L/dN.m$ |
|-----------------------|------------|------------|----------------|
| SSBR                  | 15.29      | 11.27      | 4.02           |
| Silica/SSBR           | 20.47      | 17.67      | 2.80           |
| SSBR-g-MPL70          | 14.01      | 13.90      | 0.11           |
| Silica/SSBR-g-MPL70   | 16.77      | 15.15      | 1.62           |
| SSBR-g-MUA70          | 8.73       | 8.66       | 0.07           |
| Silica/SSBR-g-MUA70   | 42.65      | 29.84      | 12.81          |
| SSBR-g-MPTES70        | 13.44      | 13.05      | 0.39           |
| Silica/SSBR-g-MPTES70 | 83.94      | 32.88      | 51.06          |

## 6. Dispersion of silica in F-SSBR matrix

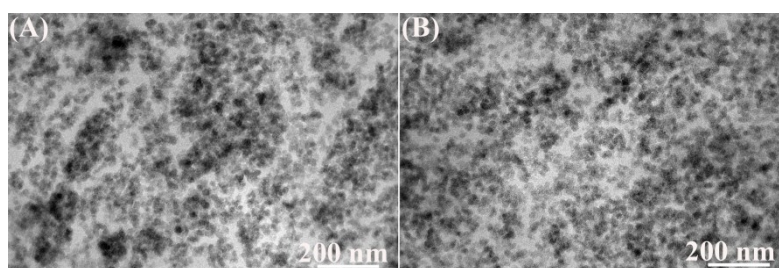

**Fig. S1.** TEM micrographs of (A) silica/SSBR-g-MPTES13 and (B) silica/SSBR-g-MPTES42 vulcanizates.

## 7. Tan $\delta$ values at 7% strain of all vulcanizates

**Table S4.** Tan  $\delta$  values at 7% strain of silica/SSBR, silica/SSBR/Si69, and silica/F-SSBR vulcanizates.

| Samples             | Tan $\delta$ values at 7% strain |
|---------------------|----------------------------------|
| Silica/SSBR         | 0.132                            |
| Silica/SSBR/Si69    | 0.112                            |
| Silica/SSBR-g-MPL70 | 0.104                            |

|                       |       |
|-----------------------|-------|
| Silica/SSBR-g-MUA70   | 0.096 |
| Silica/SSBR-g-MPTES13 | 0.110 |
| Silica/SSBR-g-MPTES42 | 0.086 |
| Silica/SSBR-g-MPTES70 | 0.065 |

## 8. Mechanical properties of all vulcanizates

**Table S5.** Mechanical properties of silica/SSBR, silica/SSBR/Si69, and silica/F-SSBR vulcanizates.

| Samples               | Modulus<br>at 100%<br>strain<br>(MPa) | Modulus<br>at 300%<br>strain<br>(MPa) | Elongation<br>at break (%) | Tensile<br>strength<br>(MPa) |
|-----------------------|---------------------------------------|---------------------------------------|----------------------------|------------------------------|
| Silica/SSBR           | 1.5                                   | 9.0                                   | 452                        | 15.0                         |
| Silica/SSBR/Si69      | 2.6                                   | 12.8                                  | 406                        | 21.0                         |
| Silica/SSBR-g-MPL70   | 4.2                                   | N/A <sup>a</sup>                      | 200                        | 14.2                         |
| Silica/SSBR-g-MUA70   | 6.3                                   | 23.3                                  | 340                        | 26.0                         |
| Silica/SSBR-g-MPTES13 | 2.8                                   | N/A <sup>a</sup>                      | 275                        | 18.2                         |
| Silica/SSBR-g-MPTES42 | 3.2                                   | N/A <sup>a</sup>                      | 248                        | 12.8                         |
| Silica/SSBR-g-MPTES70 | 11.0                                  | N/A <sup>a</sup>                      | 105                        | 11.9                         |

<sup>a</sup>Not available because of the low elongation at break.

## 9. Dynamic property parameters of all vulcanizates

**Table S6.** Dynamic property parameters of silica/SSBR, silica/SSBR/Si69, and silica/F-SSBR vulcanizates.

| Samples              | Tan $\delta_{\max}$ | Tg/ $^{\circ}$ C | Tan $\delta$ (0 $^{\circ}$ C) |
|----------------------|---------------------|------------------|-------------------------------|
| Silica/SSBR          | 0.640               | -9.0             | 0.472                         |
| Silica/SSBR/Si69     | 0.727               | -9.2             | 0.514                         |
| Silica/SSBR-g-MPL70  | 1.010               | -0.9             | 1.004                         |
| Silica/SSBR-g-MUA70  | 1.284               | -2.1             | 1.233                         |
| Silica/SSB-g-MPTES13 | 1.335               | -8.9             | 0.886                         |
| Silica/SSB-g-MPTES42 | 1.353               | -3.9             | 1.210                         |
| Silica/SSB-g-MPTES70 | 1.360               | -1.1             | 1.342                         |

## References

- 1 P. J. Flory and J. Rehner, *J. Chem. Phys.*, 1943, **11**, 521–526.

- 2 P. J. Flory and J. Rehner, *J. Chem. Phys.*, 1943, **11**, 512–520.
- 3 W. Salgueiro, A. Somoza, A. J. Marzocca, I. Torriani and M. A. Mansilla, *J. Polym. Sci., Part B: Polym. Phys.*, 2009, **47**, 2320–2327.
- 4 A. J. Marzocca, *Eur. Polym. J.*, 2007, **43**, 2682-2689.
- 5 C. J. Sheehan and A. L. Bisio, *Rubber Chem. Technol.*, 1966, **39**, 149-192.
